# Supplementary material for: HIF-1α overexpression in mesenchymal stem cell-derived exosome-encapsulated arginine-glycine-aspartate (RGD) hydrogels boost therapeutic efficacy of cardiac repair after myocardial infarction
Source: PubMed Central journal article supplement — Mater Today Bio. 2021 Nov 27;12:100171. doi: 10.1016/j.mtbio.2021.100171 (PMC8640519; doi:10.1016/j.mtbio.2021.100171), 2021-11-27

**Supplementary table 1. Sequences of primer, miR-221-3p inhibitor and its negative controls**

| <b>Primers</b>                                          | <b>Sequences (5'-3')</b> |
|---------------------------------------------------------|--------------------------|
| <b>Primers for quantitative real-time PCR or RT-PCR</b> |                          |
| Hsa-miR-221-3p-Forward                                  | GGGAGCTACATTGTCTGCTG     |
| Hsa-miR-221-3p-Reverse                                  | GAGAGGAGAGGAAGAGGGAA     |
| Rno-miR-221-3p-Forward                                  | GGGAGCTACATTGTCTGCTG     |
| Rno-miR-221-3p-Reverse                                  | GAGAGGAGAGGAAGAGGGAA     |
| Cel-miR-39-3p Forward                                   | GGGTCACCGGGTGTAATC       |
| Cel-miR-39-3p Reverse                                   | GAGAGGAGAGGAAGAGGGAA     |
| Hsa-HIF-1 $\alpha$ Forward                              | GCAGCAACGACACAGAAA       |
| Hsa-HIF-1 $\alpha$ Reverse                              | AGCGGTGGGTAATGGAG        |
| GAPDH Forward                                           | GAACGGGAAGCTCACTGG       |
| GAPDH Reverse                                           | GCCTGCTTCACCACCTTCT      |
| <b>miR-221-3p inhibitor</b>                             |                          |
| miR-221-3p inhibitor                                    | AGGAGACUCACAAGUCCUGC     |
| miR-221-5p inhibitor negative control                   | CAGUACUUUUGUGUAGUACAAA   |

**Supplementary Table 2. Comparison of ecocardiographic parameters in each group**

| <b>Parameters</b> | <b>PBS</b>         | <b>NC-EVs</b>      | <b>HIF-1<math>\alpha</math>-EVs</b> |
|-------------------|--------------------|--------------------|-------------------------------------|
| Heart Rate (bpm)  | 392.18 $\pm$ 18.54 | 340.18 $\pm$ 24.03 | 370.02 $\pm$ 8.67                   |
| LVDs (mm)         | 8.12 $\pm$ 0.42    | 7.49 $\pm$ 0.29    | 6.83 $\pm$ 0.26*                    |
| LVDd (mm)         | 9.40 $\pm$ 0.37    | 9.05 $\pm$ 0.33    | 8.81 $\pm$ 0.32                     |
| LVEF (%)          | 28.01 $\pm$ 2.37   | 34.47 $\pm$ 1.09*  | 43.39 $\pm$ 0.54***##               |
| FS (%)            | 13.81 $\pm$ 1.24   | 17.30 $\pm$ 0.61*  | 22.46 $\pm$ 0.31***##               |
| LVPWs (mm)        | 2.51 $\pm$ 0.12    | 2.42 $\pm$ 0.33    | 3.13 $\pm$ 0.11#                    |
| LVPWd (mm)        | 1.98 $\pm$ 0.13    | 1.84 $\pm$ 0.25    | 2.10 $\pm$ 0.17                     |

n=4 for each group. All data are mean  $\pm$  SEM. Statistical analysis was performed with one-way ANOVA followed by the Tukey's test. \*P<0.05, \*\*\*P<0.0001 compared with PBS group, #P<0.05, ##P<0.001 compared with NC-EVs group. bpm: beat per minute; LVDs: left ventricular end systolic diameter; LVDd: left ventricular end diastolic diameter; LVEF: left ventricular ejection fraction; FS: fractional shortening; LVPWs: left ventricular posterior wall thickness at end-systole; LVPWd: Left ventricular posterior wall thickness at end diastolic.

**Supplementary Table 3. Comparison of ecocardiographic parameters between HIF-1 $\alpha$ -EVs and HIF-1 $\alpha$ -EVs RGD-Biotin group**

| <b>Parameters</b> | <b>HIF-1<math>\alpha</math>-EVs</b> | <b>HIF-1<math>\alpha</math>-EVs RGD-Biotin</b> |
|-------------------|-------------------------------------|------------------------------------------------|
| Heart Rate (bpm)  | 410.67 $\pm$ 23.77                  | 364.10 $\pm$ 19.89                             |
| LVDs (mm)         | 6.50 $\pm$ 0.19                     | 5.95 $\pm$ 0.32                                |
| LVDd (mm)         | 8.22 $\pm$ 0.22                     | 8.38 $\pm$ 0.26                                |
| LVEF (%)          | 41.10 $\pm$ 0.97                    | 53.82 $\pm$ 2.90**                             |
| FS (%)            | 20.99 $\pm$ 0.56                    | 29.18 $\pm$ 1.99*                              |
| LVPWs (mm)        | 2.88 $\pm$ 0.09                     | 2.93 $\pm$ 0.09                                |
| LVPWd (mm)        | 2.09 $\pm$ 0.15                     | 1.79 $\pm$ 0.09                                |

n=4-6 for each group. All data are mean  $\pm$ SEM. Statistical analysis was performed with t test.

\*P<0.05, \*\*P<0.001. bpm: beat per minute; LVDs: left ventricular end systolic diameter; LVDd: left ventricular end diastolic diameter; LVEF: left ventricular ejection fraction; FS: fractional shortening; LVPWs: left ventricular posterior wall thickness at end-systole; LVPWd: Left ventricular posterior wall thickness at end diastolic.

**Supplementary Figure 1. qRT-PCR analysis of relative expression of HIF-1 $\alpha$  mRNA in MSCs, NC-MSCs and HIF-1 $\alpha$ -MSCs.** Continuous variables were described by means  $\pm$  SEM. n=3 for each group. \*\*\*P< 0.001, NS: not significant.

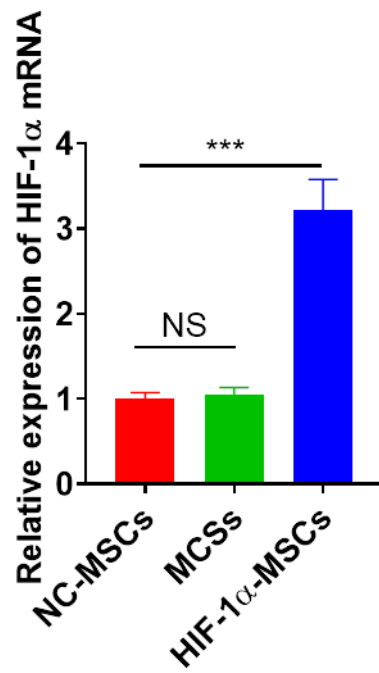

**Supplementary Figure 2. High performance liquid chromatography (HPLC) analysis of RGD-Biotin peptide.** HPLC analysis showed that the purity was 95.09%.

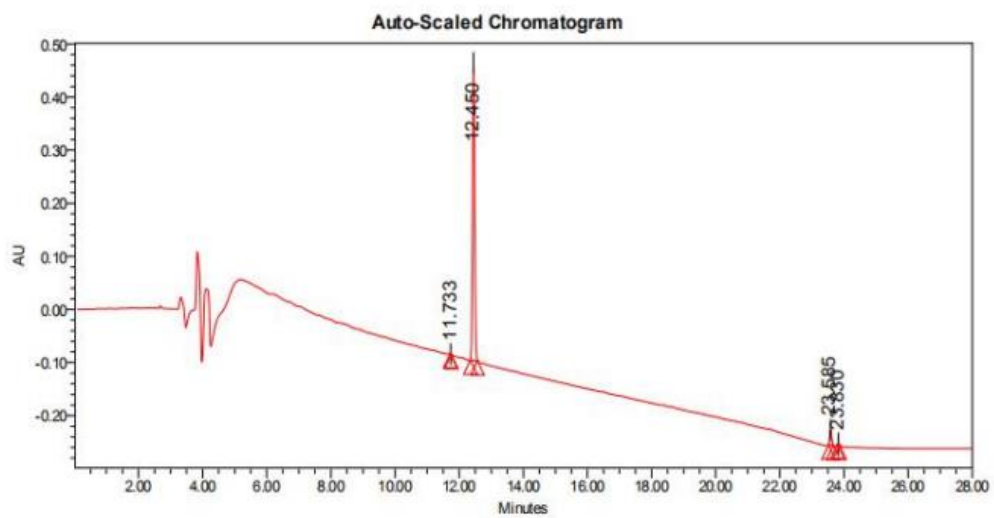

| Peak Results |        |         |        |        |
|--------------|--------|---------|--------|--------|
|              | RT     | Area    | Height | % Area |
| 1            | 11.733 | 178     | 178    | 0.01   |
| 2            | 12.450 | 2524262 | 549588 | 95.09  |
| 3            | 23.585 | 122945  | 28181  | 4.63   |
| 4            | 23.830 | 7126    | 2847   | 0.27   |

**Supplementary Figure 3.** Mass Spectrometry (MS) spectrum of RGD-Biotin molecule. Expected MS= 1144.29, observed (M+H)<sup>+</sup> = 1144.686.

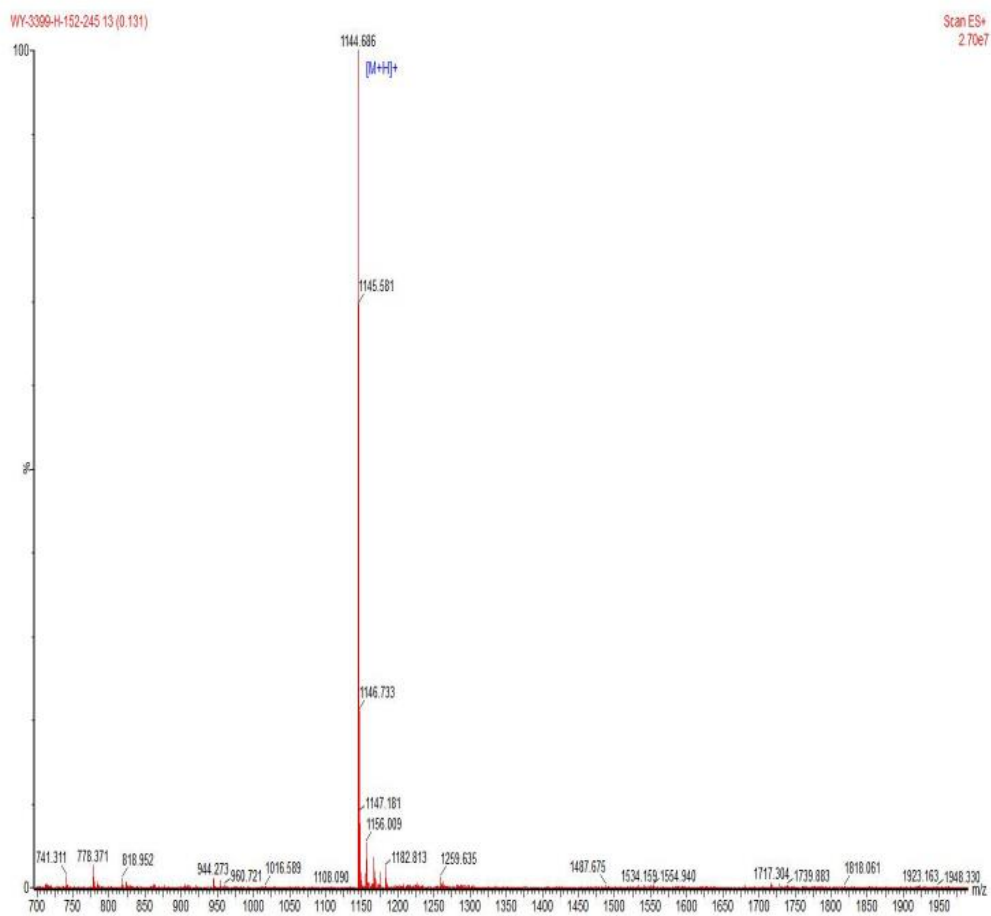

**Supplementary Figure 4.** Dynamic frequency sweep of EV/RGD hydrogel encapsulating EVs at a mass ratio of 1:1 (green) and 2:1 (red), respectively at 37 °C.  $G'$ : storage moduli,  $G''$ : loss moduli.

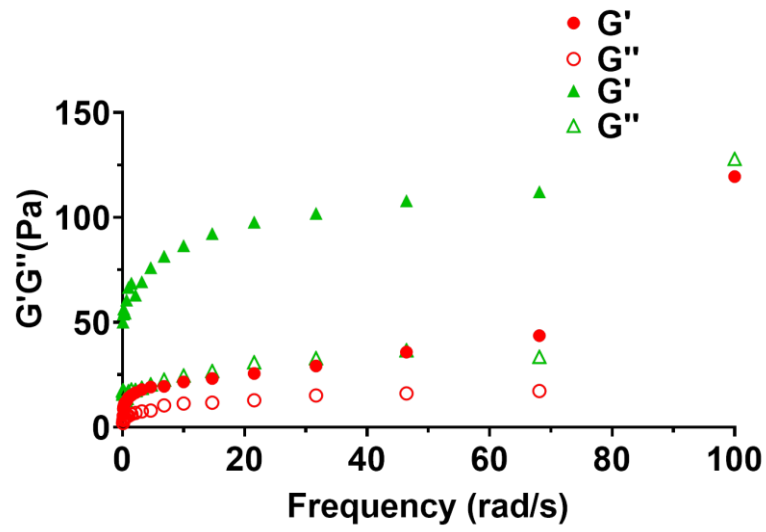

**Supplementary Figure 5. qRT-PCR and westernblot analysis of relative expression of HIF-1 $\alpha$  mRNA and protein in EVs derived from NC-MSCs and HIF-1 $\alpha$ -MSCs. A) qRT-PCR analysis of relative expression of HIF-1 $\alpha$  mRNA in EVs derived from NC-MSCs and HIF-1 $\alpha$ -MSCs. B) westernblot and quantitative analysis of relative expression of HIF-1 $\alpha$  protein in EVs derived from NC-MSCs and HIF-1 $\alpha$ -MSCs. Continuous variables were described by means  $\pm$  SEM. n=3 for each group. NS: not significant.**

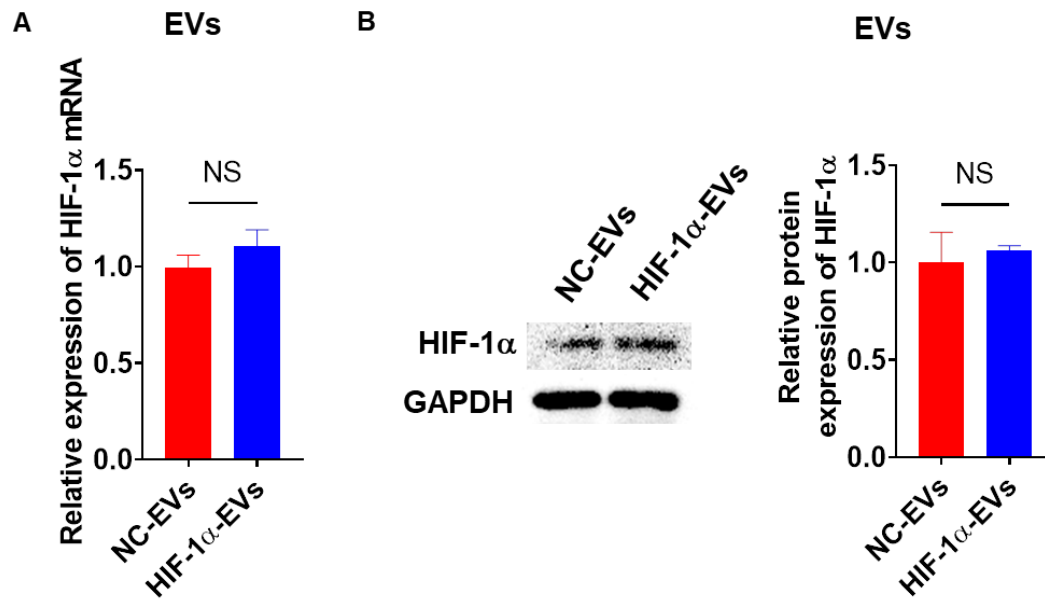

Supplement: mmc1.pdf [file mmc1.pdf]
